# Supplementary material
Source: ML conference proceedings conference paper supplement (https://openreview.net/forum?id=QupYhLEVNj)

Brier score

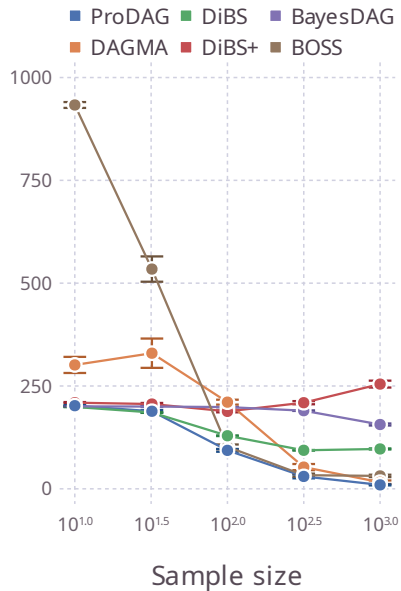

Expected SHD

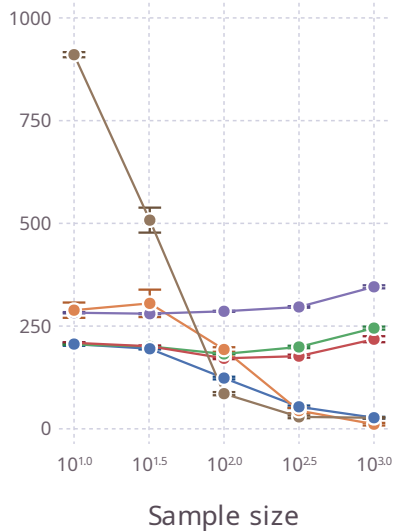

Expected F1 score

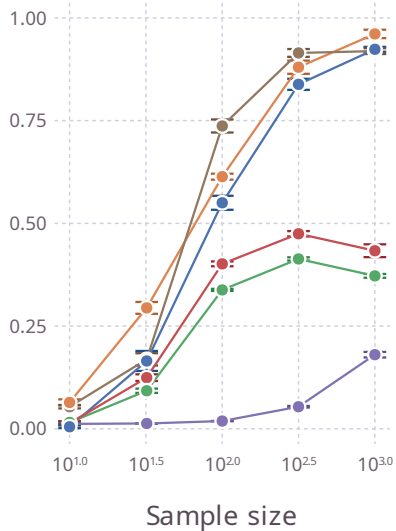

AUROC

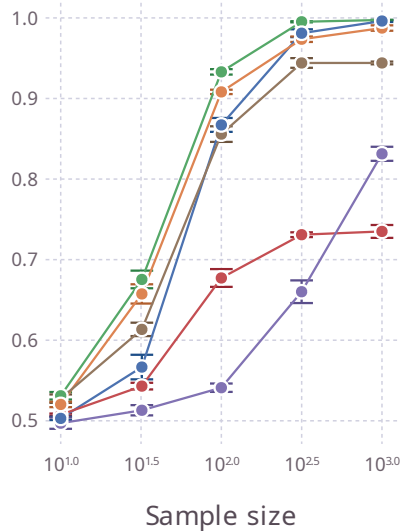

Supplement: supplementary_material [file synthetic_linear_100_200_erdos_renyi_exponential.pdf › Experiments/Figures/synthetic_linear_100_200_erdos_renyi_exponential.pdf]

Brier score

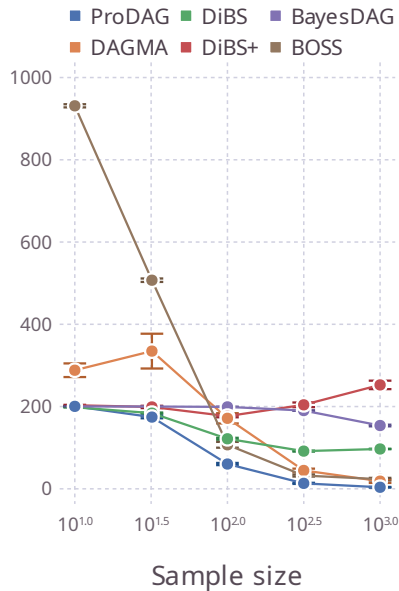

Expected SHD

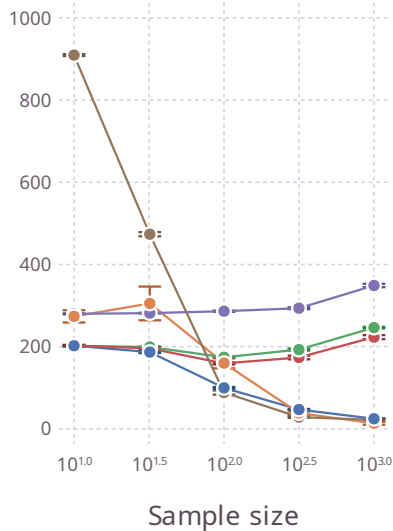

Expected F1 score

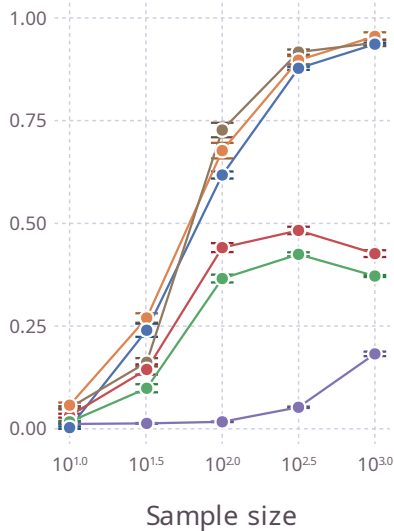

AUROC

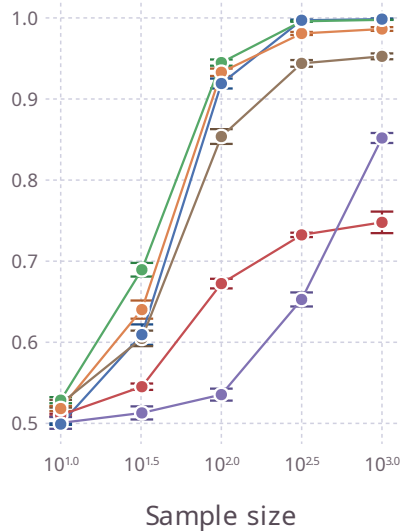

Supplement: supplementary_material [file synthetic_linear_100_200_erdos_renyi_gaussian.pdf › Experiments/Figures/synthetic_linear_100_200_erdos_renyi_gaussian.pdf]

Brier score

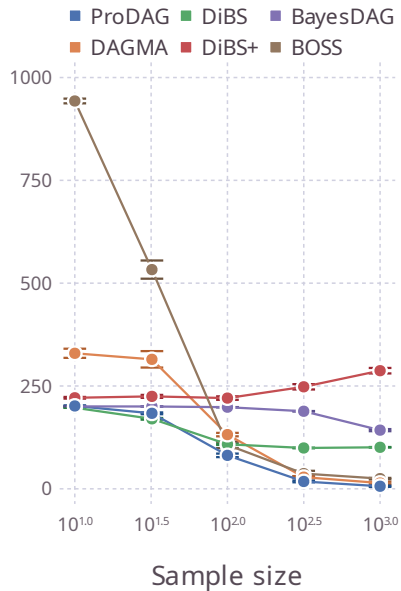

Expected SHD

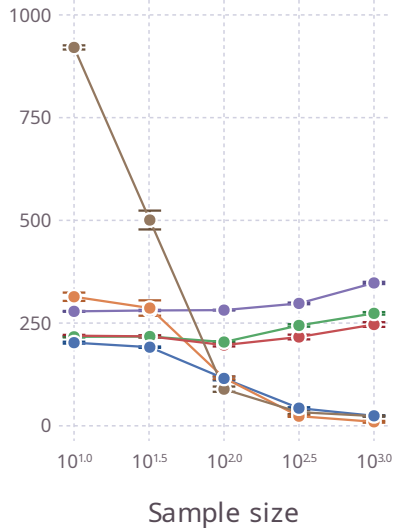

Expected F1 score

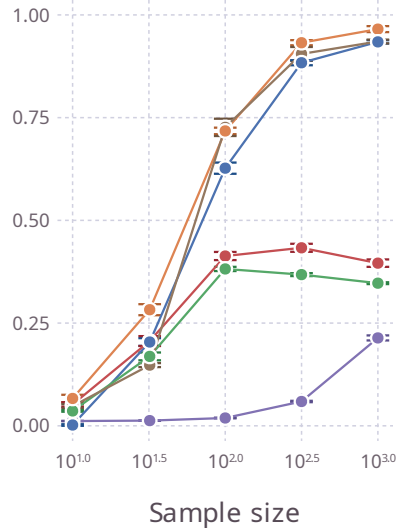

AUROC

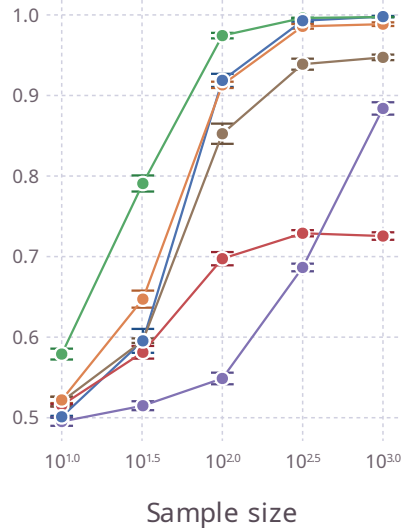

Supplement: supplementary_material [file synthetic_linear_100_200_erdos_renyi_gumbel.pdf › Experiments/Figures/synthetic_linear_100_200_erdos_renyi_gumbel.pdf]

Brier score

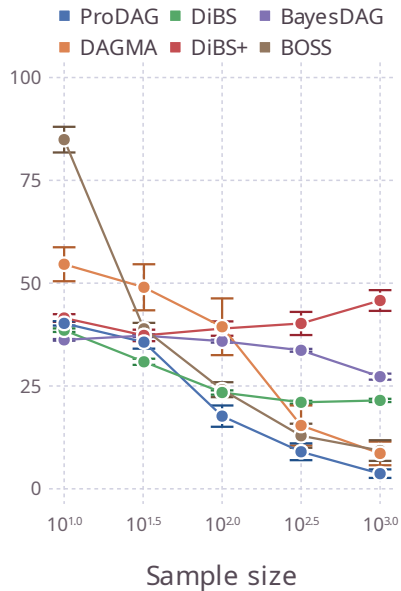

Expected SHD

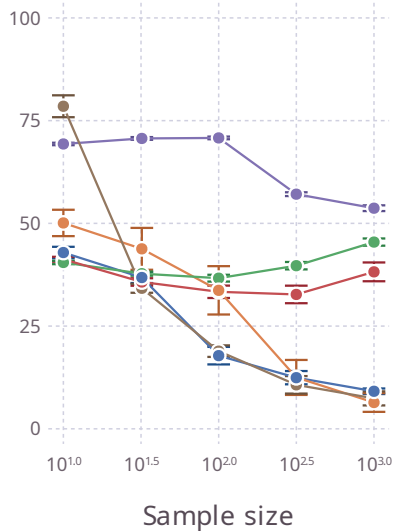

Expected F1 score

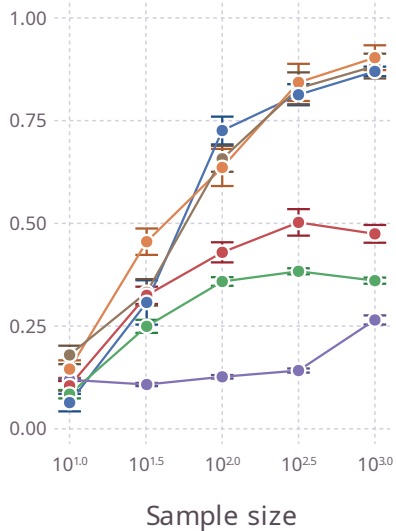

AUROC

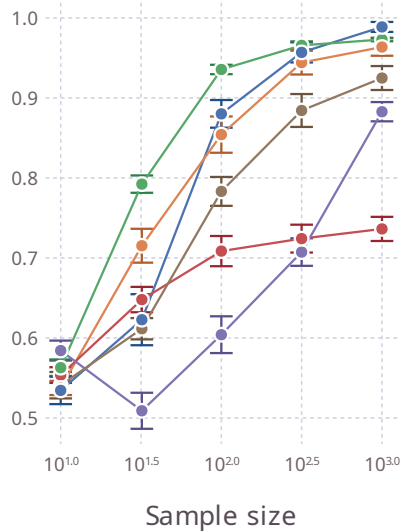

Supplement: supplementary_material [file synthetic_linear_20_40_erdos_renyi_exponential.pdf › Experiments/Figures/synthetic_linear_20_40_erdos_renyi_exponential.pdf]

Brier score

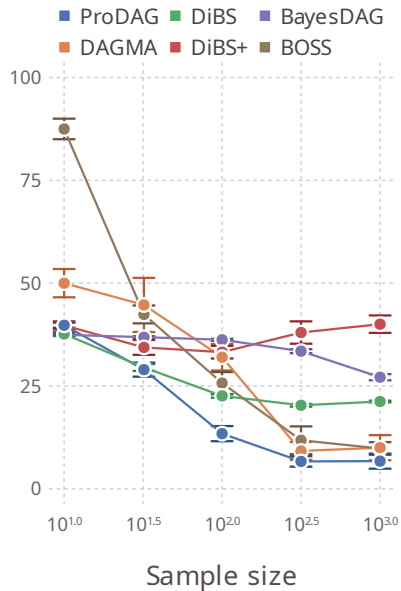

Expected SHD

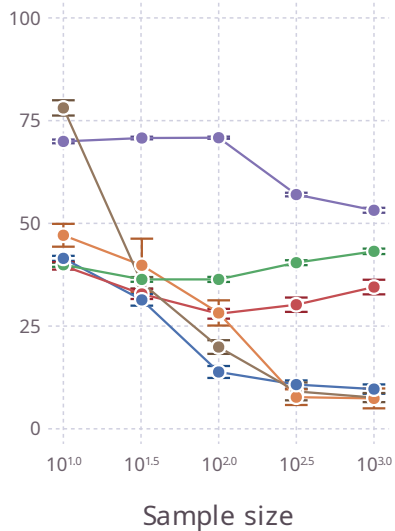

Expected F1 score

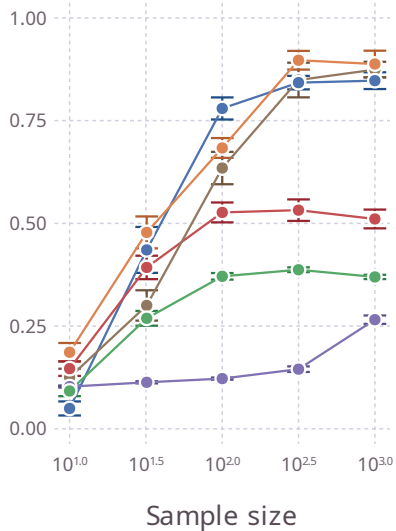

AUROC

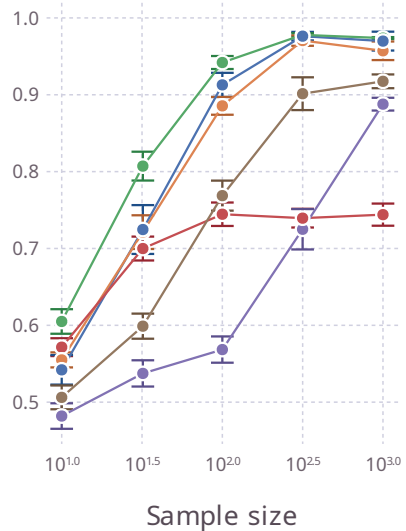

Supplement: supplementary_material [file synthetic_linear_20_40_erdos_renyi_gaussian.pdf › Experiments/Figures/synthetic_linear_20_40_erdos_renyi_gaussian.pdf]

Brier score

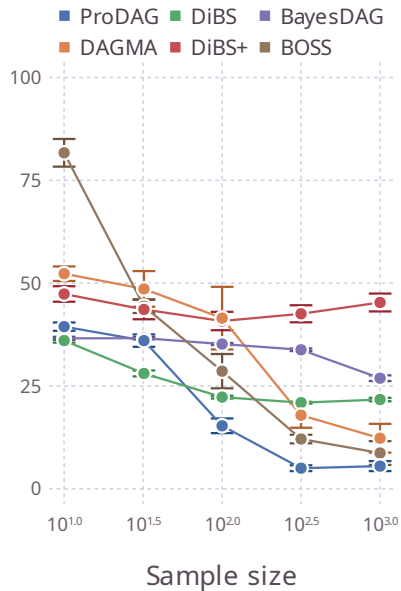

Expected SHD

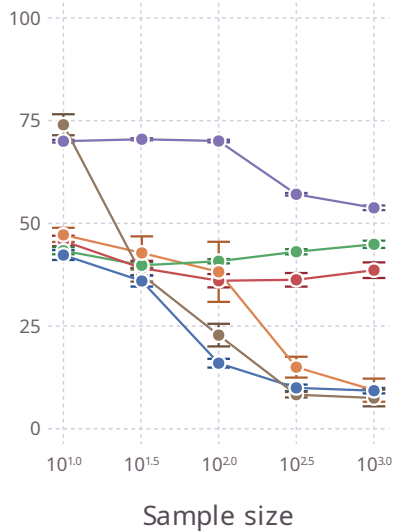

Expected F1 score

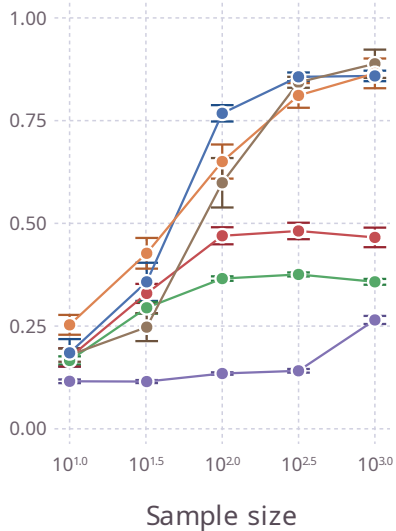

AUROC

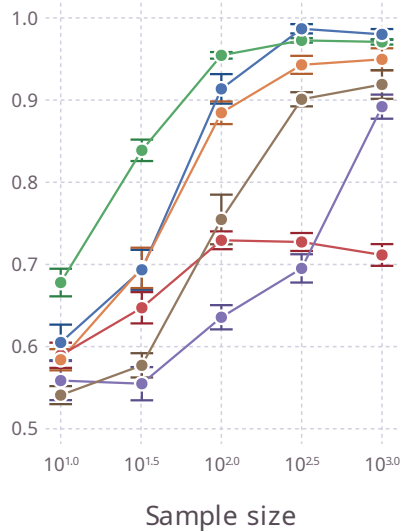

Supplement: supplementary_material [file synthetic_linear_20_40_erdos_renyi_gumbel.pdf › Experiments/Figures/synthetic_linear_20_40_erdos_renyi_gumbel.pdf]

Brier score

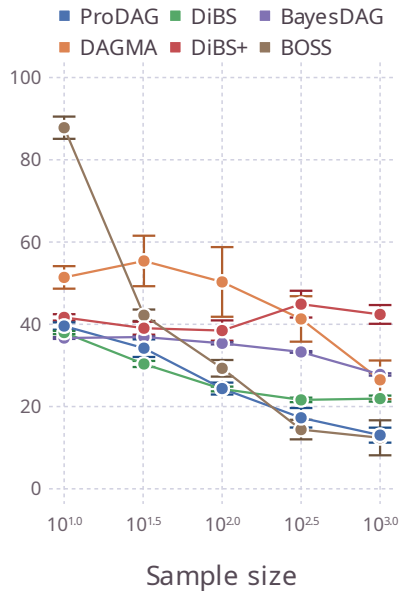

Expected SHD

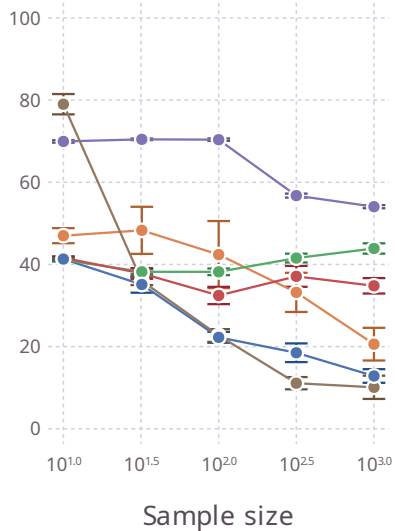

Expected F1 score

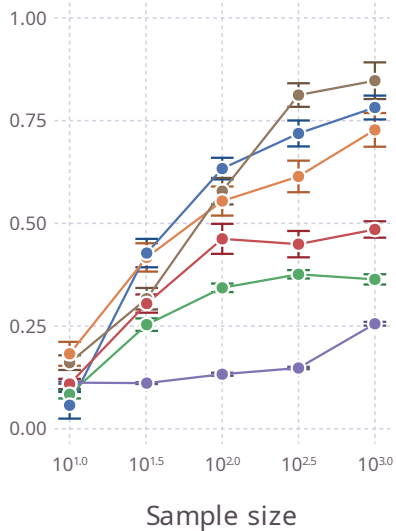

AUROC

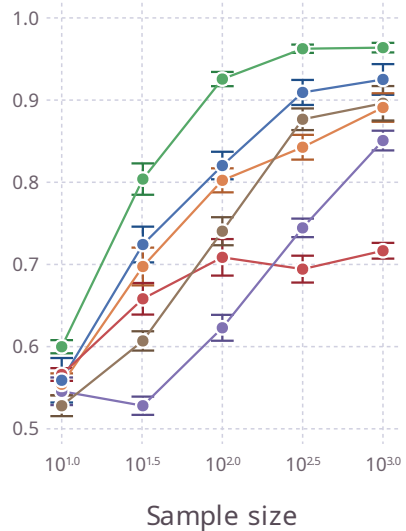

Supplement: supplementary_material [file synthetic_linear_20_40_erdos_renyi_heteroscedastic_gaussian.pdf › Experiments/Figures/synthetic_linear_20_40_erdos_renyi_heteroscedastic_gaussian.pdf]

Brier score

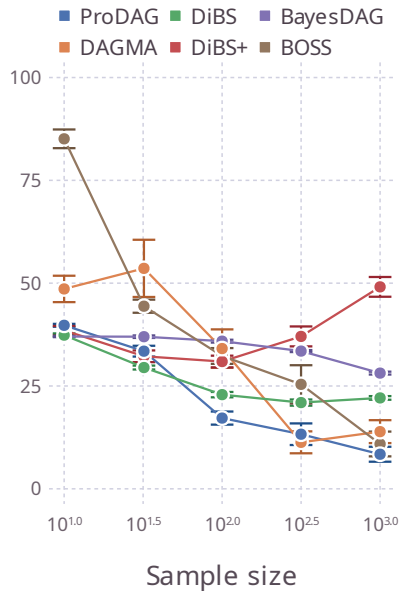

Expected SHD

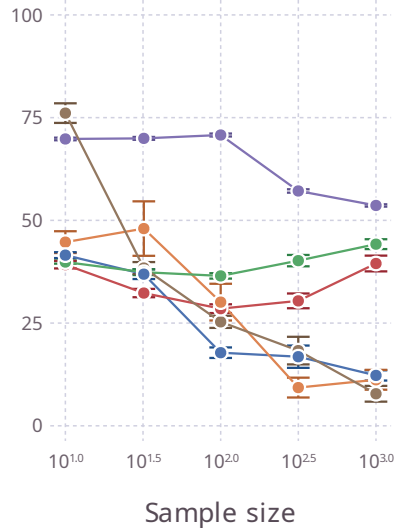

Expected F1 score

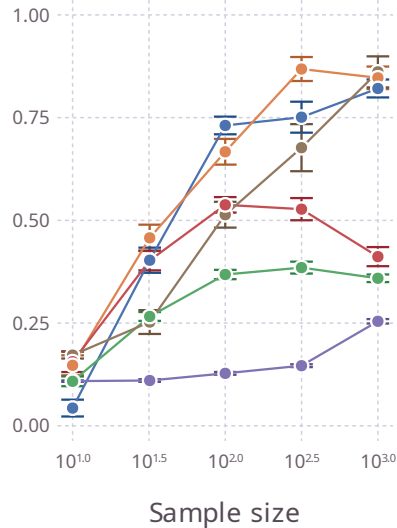

AUROC

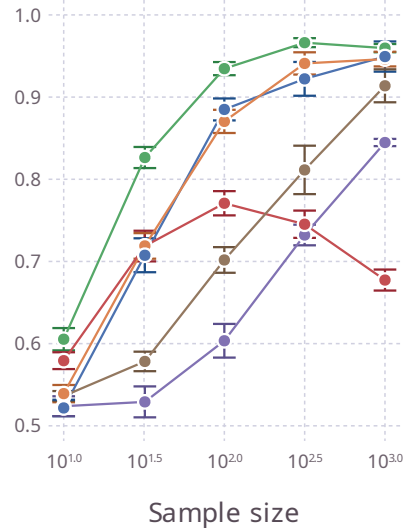

Supplement: supplementary_material [file synthetic_linear_20_40_scale_free_2_gaussian.pdf › Experiments/Figures/synthetic_linear_20_40_scale_free_2_gaussian.pdf]

Brier score

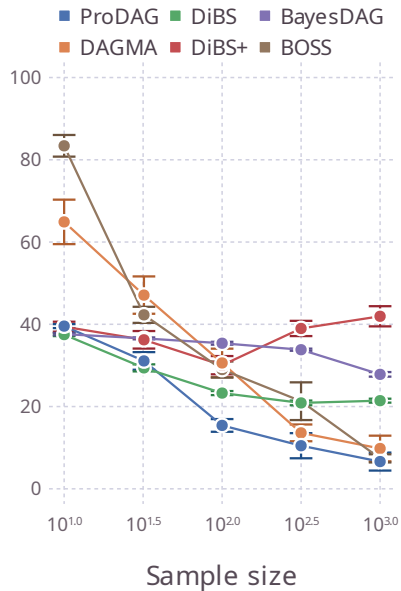

Expected SHD

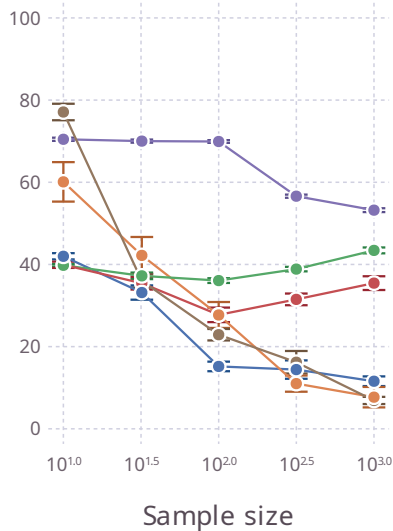

Expected F1 score

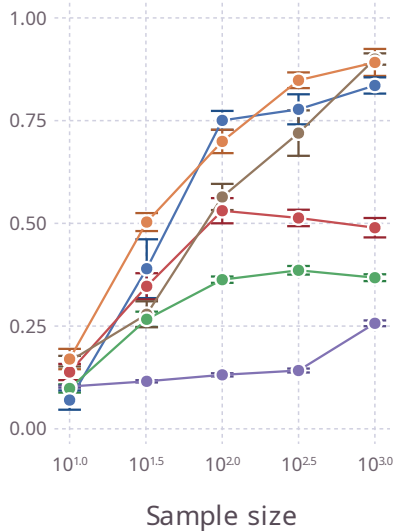

AUROC

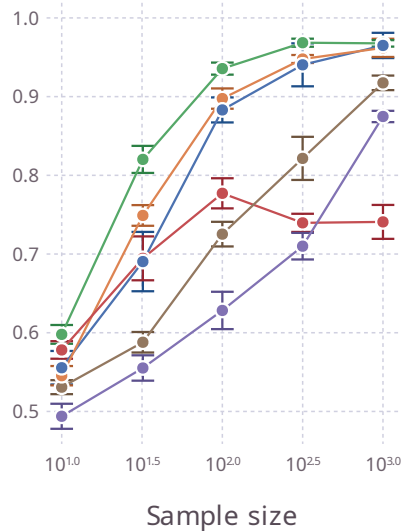

Supplement: supplementary_material [file synthetic_linear_20_40_scale_free_3_gaussian.pdf › Experiments/Figures/synthetic_linear_20_40_scale_free_3_gaussian.pdf]

Brier score

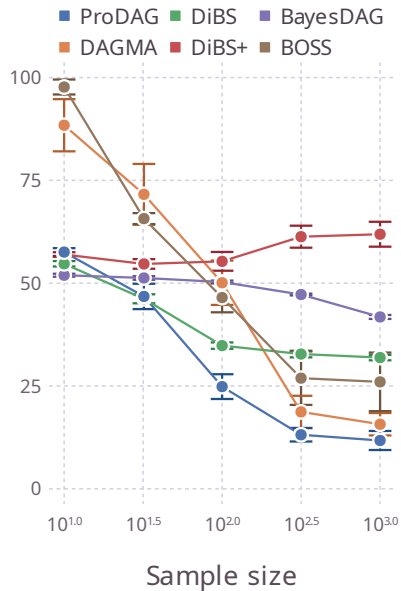

Expected SHD

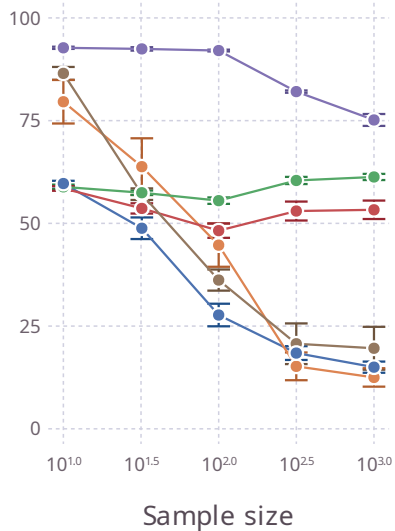

Expected F1 score

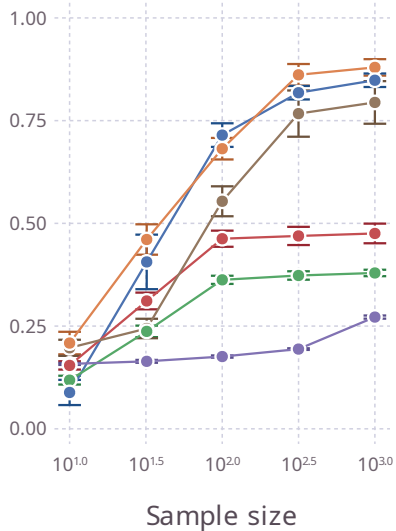

AUROC

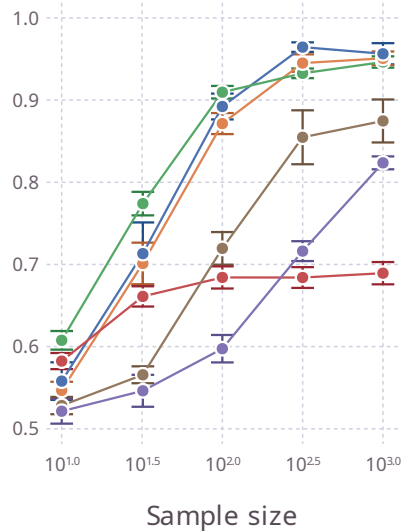

Supplement: supplementary_material [file synthetic_linear_20_60_erdos_renyi_gaussian.pdf › Experiments/Figures/synthetic_linear_20_60_erdos_renyi_gaussian.pdf]

Brier score

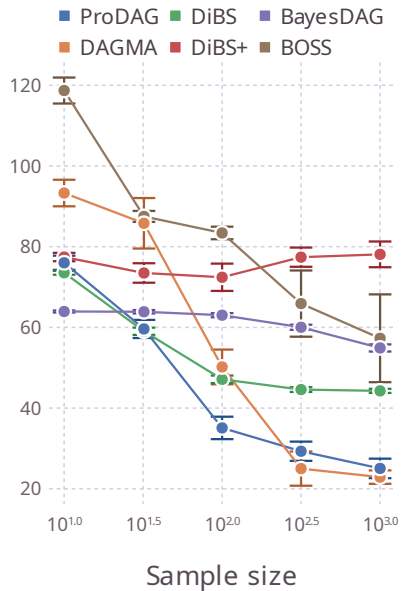

Expected SHD

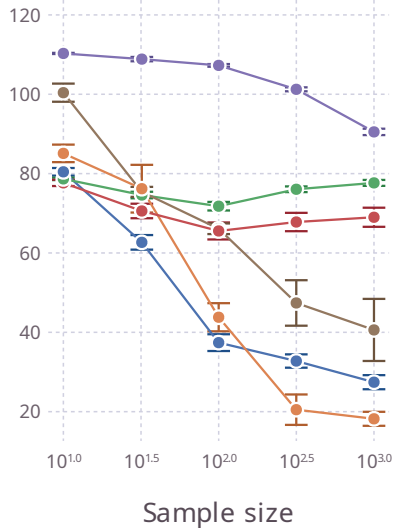

Expected F1 score

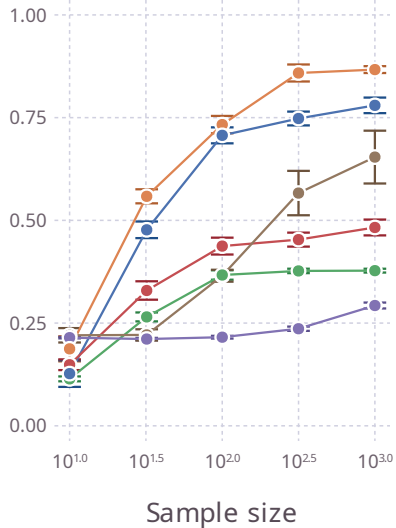

AUROC

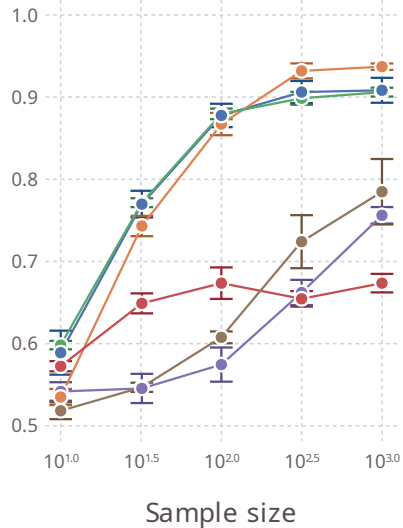

Supplement: supplementary_material [file synthetic_linear_20_80_erdos_renyi_gaussian.pdf › Experiments/Figures/synthetic_linear_20_80_erdos_renyi_gaussian.pdf]

Brier score

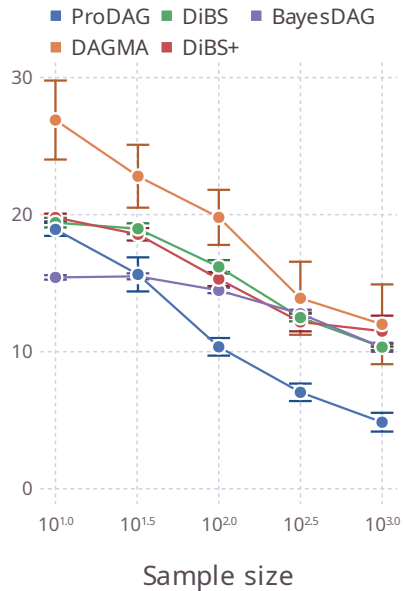

Expected SHD

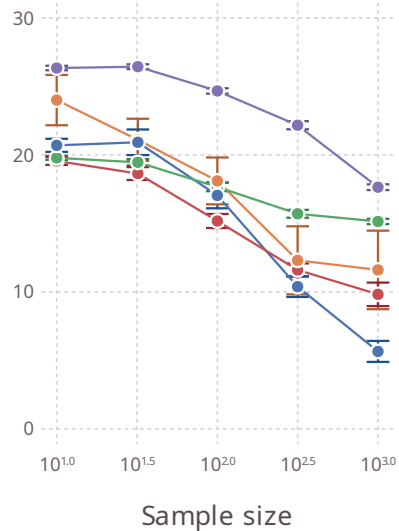

Expected F1 score

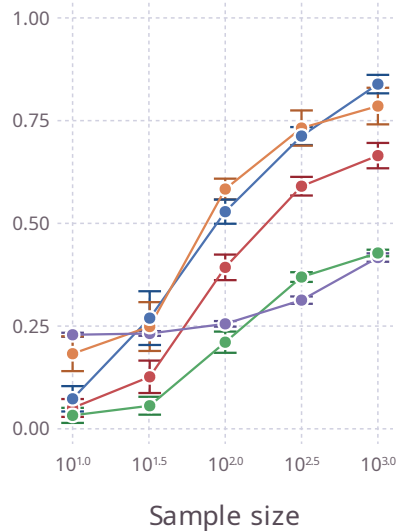

AUROC

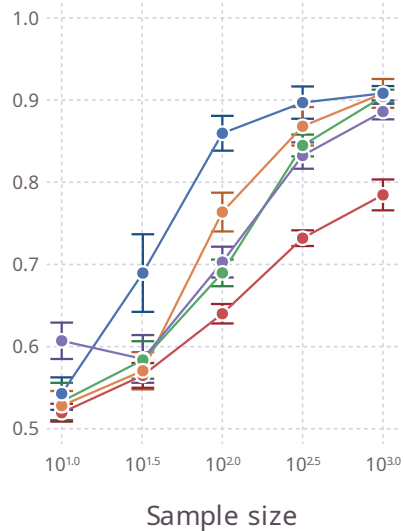

Supplement: supplementary_material [file synthetic_nonlinear_10_20.pdf › Experiments/Figures/synthetic_nonlinear_10_20.pdf]

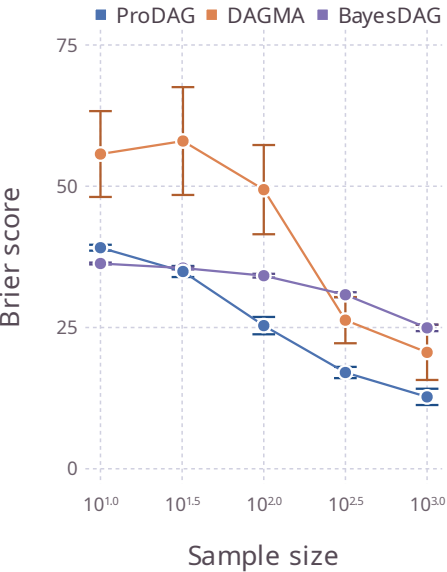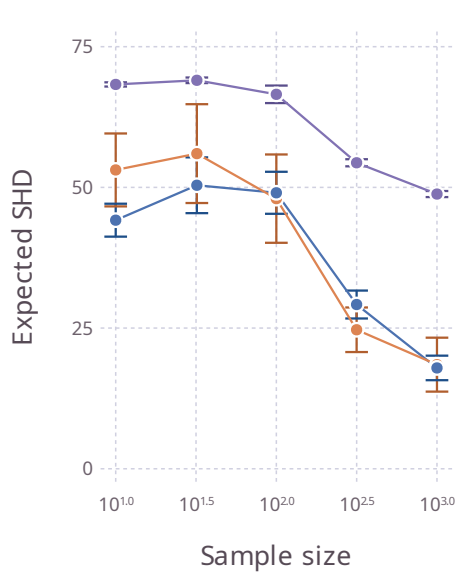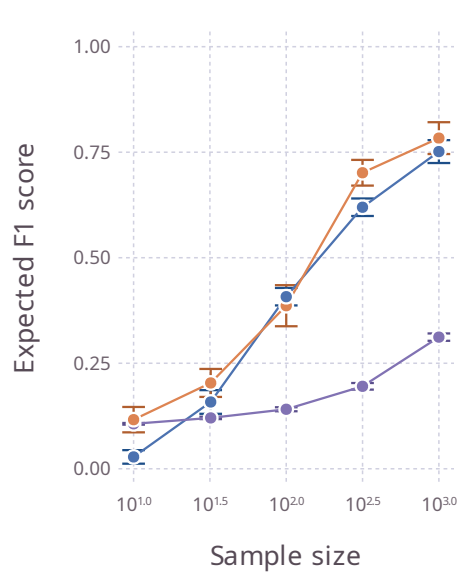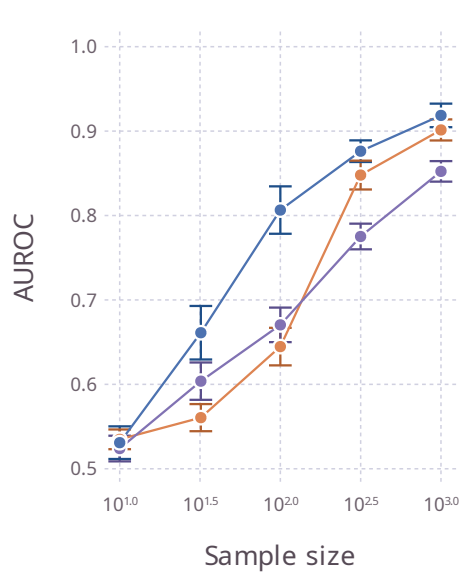

Supplement: supplementary_material [file synthetic_nonlinear_20_40.pdf › Experiments/Figures/synthetic_nonlinear_20_40.pdf]

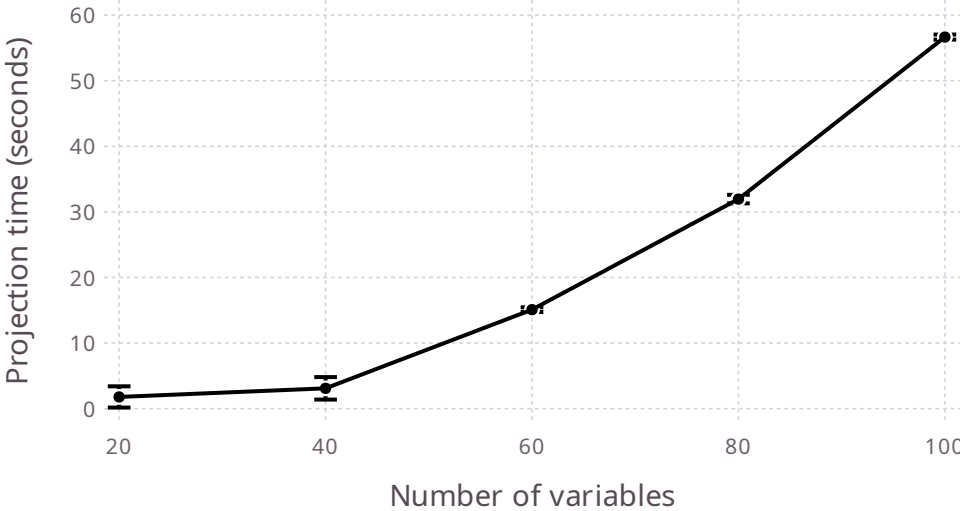

Supplement: supplementary_material [file timings_projection.pdf › Experiments/Figures/timings_projection.pdf]

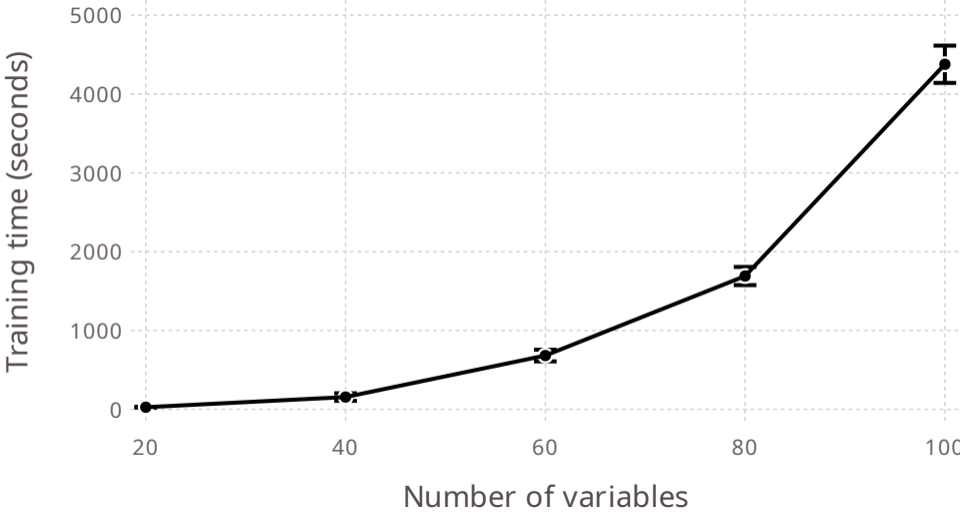

Supplement: supplementary_material [file timings_training.pdf › Experiments/Figures/timings_training.pdf]
